# Supplementary material for: The cross-talk between lateral sheet dimensions of pristine graphene oxide nanoparticles and Ni2+ adsorption
Source: Royal Society of Chemistry journal article supplement (doi:10.1039/d1ra00400j), 2021-01-01
Supplement: d1ra00400j1.pdf [file d1ra00400j1.pdf]

### Supplementary Information

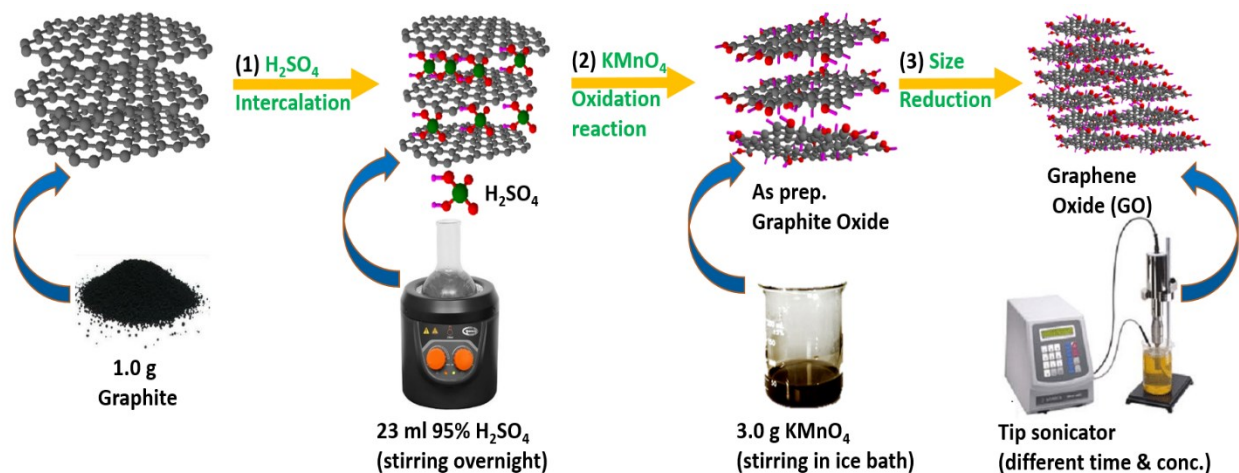

Scheme 1: Schematic representation of graphene oxide formation by using tip sonicator.

Table 1: Langmuir and Freundlich parameters for the adsorption of Ni<sup>2+</sup> onto GO – 450 nm at 25°C.

| Time (min) | Langmuir isotherm                    |                                      |                | Freundlich isotherm |       |
|------------|--------------------------------------|--------------------------------------|----------------|---------------------|-------|
|            | q <sub>m</sub> (mg g <sup>-1</sup> ) | K <sub>L</sub> (L mg <sup>-1</sup> ) | R <sub>L</sub> | K <sub>F</sub>      | n     |
| 10         | 26.316                               | 0.0008                               | 0.122          | 2.983               | 4.405 |
| 30         | 37.037                               | 0.0014                               | 0.074          | 4.149               | 4.132 |
| 60         | 43.478                               | 0.0023                               | 0.046          | 6.686               | 4.762 |
| 90         | 43.487                               | 0.0028                               | 0.036          | 8.381               | 5.291 |
| 120        | 46.729                               | 0.0031                               | 0.034          | 9.593               | 5.495 |

Table 2: Langmuir and Freundlich parameters for the adsorption of Ni<sup>2+</sup> onto GO 200nm at 25°C

| Time (min) | Langmuir isotherm                    |                                      |                | Freundlich isotherm |       |
|------------|--------------------------------------|--------------------------------------|----------------|---------------------|-------|
|            | q <sub>m</sub> (mg g <sup>-1</sup> ) | K <sub>L</sub> (L mg <sup>-1</sup> ) | R <sub>L</sub> | K <sub>F</sub>      | n     |
| 10         | 34.483                               | 0.0008                               | 0.113          | 2.968               | 3.802 |
| 30         | 55.556                               | 0.0006                               | 0.156          | 1.532               | 2.591 |
| 60         | 66.667                               | 0.0008                               | 0.124          | 5.419               | 3.802 |
| 90         | 71.428                               | 0.0012                               | 0.085          | 6.567               | 3.861 |
| 120        | 76.923                               | 0.0005                               | 0.191          | 5.624               | 3.331 |

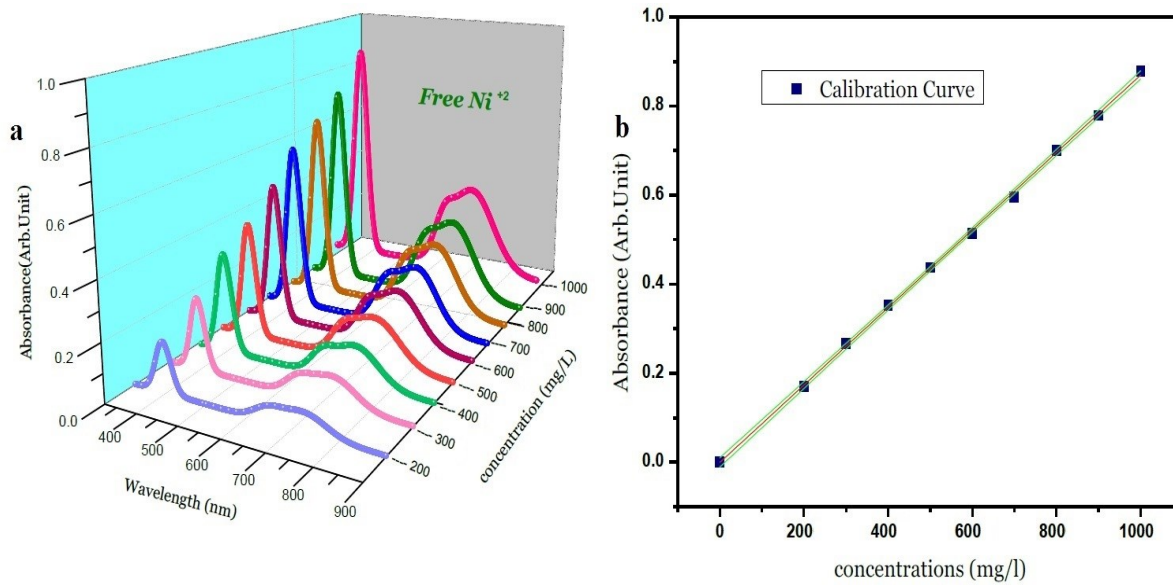

Fig. 1: (a) UV-visible spectroscopy of Ni<sup>2+</sup> at different concentrations. (b) The calibration curve of Ni<sup>2+</sup> samples.

Table 4: pseudo-first-order and pseudo-second-order parameters for the adsorption of the Ni<sup>2+</sup> onto GO – 450 nm at 25 °C.

| <b>C<sub>i</sub></b><br><b>mg/L</b> | <b>q<sub>e,exp</sub></b><br><b>mg/g</b> | <b>Pseudo first order</b>                         |                                            |                      | <b>Pseudo second order</b>              |                                            |                      |
|-------------------------------------|-----------------------------------------|---------------------------------------------------|--------------------------------------------|----------------------|-----------------------------------------|--------------------------------------------|----------------------|
|                                     |                                         | <b>K<sub>1</sub></b><br><b>(min<sup>-1</sup>)</b> | <b>q<sub>e, cal</sub></b><br><b>(mg/g)</b> | <b>R<sup>2</sup></b> | <b>K<sub>2</sub></b><br><b>g/mg.min</b> | <b>q<sub>e, cal</sub></b><br><b>(mg/g)</b> | <b>R<sup>2</sup></b> |
| 200                                 | 25.093                                  | 0.023                                             | 12.098                                     | 0.929                | 0.00325                                 | 27.027                                     | 0.998                |
| 300                                 | 34.718                                  | 0.025                                             | 21.499                                     | 0.983                | 0.00147                                 | 38.462                                     | 0.998                |
| 400                                 | 36.889                                  | 0.029                                             | 19.747                                     | 0.883                | 0.00177                                 | 41.667                                     | 0.999                |
| 500                                 | 39.571                                  | 0.028                                             | 22.874                                     | 0.939                | 0.00645                                 | 43.478                                     | 0.999                |
| 600                                 | 42.963                                  | 0.027                                             | 28.106                                     | 0.968                | 0.00141                                 | 47.619                                     | 0.997                |
| 700                                 | 43.747                                  | 0.027                                             | 27.495                                     | 0.981                | 0.00153                                 | 47.619                                     | 0.998                |

|     |        |       |        |       |         |        |       |
|-----|--------|-------|--------|-------|---------|--------|-------|
| 800 | 44.183 | 0.028 | 26.076 | 0.987 | 0.00168 | 47.619 | 0.998 |
| 900 | 44.447 | 0.027 | 25.636 | 0.987 | 0.00171 | 47.619 | 0.999 |

Table 5: pseudo-first-order and pseudo-second-order parameters for the adsorption of the Ni<sup>2+</sup> onto GO – 200 nm at 25 °C.

| C <sub>i</sub><br>mg/L | q <sub>e,exp</sub><br>mg/g | Pseudo first order                     |                               |                | Pseudo second order        |                               |                |
|------------------------|----------------------------|----------------------------------------|-------------------------------|----------------|----------------------------|-------------------------------|----------------|
|                        |                            | K <sub>1</sub><br>(min <sup>-1</sup> ) | q <sub>e, cal</sub><br>(mg/g) | R <sup>2</sup> | K <sub>2</sub><br>g/mg.min | q <sub>e, cal</sub><br>(mg/g) | R <sup>2</sup> |
| 200                    | 27.989                     | 0.026                                  | 9.281                         | 0.632          | 0.00459                    | 29.412                        | 0.999          |
| 300                    | 35.105                     | 0.025                                  | 26.469                        | 0.930          | 0.00142                    | 38.462                        | 0.967          |
| 400                    | 41.534                     | 0.026                                  | 28.588                        | 0.949          | 0.00143                    | 45.455                        | 0.983          |
| 500                    | 49.164                     | 0.027                                  | 41.470                        | 0.867          | 0.00092                    | 55.556                        | 0.976          |
| 600                    | 55.079                     | 0.030                                  | 42.479                        | 0.989          | 0.00095                    | 62.500                        | 0.994          |
| 700                    | 66.137                     | 0.030                                  | 66.819                        | 0.861          | 0.00057                    | 76.923                        | 0.974          |
| 800                    | 73.937                     | 0.032                                  | 86.747                        | 0.867          | 0.00046                    | 83.330                        | 0.971          |
| 900                    | 72.825                     | 0.029                                  | 77.029                        | 0.741          | 0.00051                    | 83.330                        | 0.957          |

Table 6. Kinetic Parameters and regression coefficient (R<sup>2</sup>) of Nickel adsorption on GO (450 nm, 200 nm)

| Absorbent | q <sub>e exp</sub> (mg/g) | Pseudo-first-order model |                           |                | Pseudo-second-order model |                           |                |
|-----------|---------------------------|--------------------------|---------------------------|----------------|---------------------------|---------------------------|----------------|
|           |                           | K <sub>1</sub> (1/min)   | q <sub>e cal</sub> (mg/g) | R <sup>2</sup> | K <sub>2</sub> (1/min)    | q <sub>e exp</sub> (mg/g) | R <sup>2</sup> |
| GO 450nm  | 36.889                    | 0.029                    | 19.747                    | 0.883          | 0.0018                    | 41.667                    | 0.999          |
| GO 200nm  | 41.534                    | 0.026                    | 28.588                    | 0.940          | 0.0014                    | 45.455                    | 0.983          |

Table 7. Comparison of the maximum adsorption capacity q<sub>m</sub> (mg/g) of several heavy metal ions on GO.

| Adsorbent   | Metal ions       | $q_m(mg/g)$ | Conditions                 | Ref.       |
|-------------|------------------|-------------|----------------------------|------------|
| GO – 200 nm | Ni <sup>+2</sup> | 66.667      | pH=6, T=25 °C, t=60 min    | This study |
| GO – 450 nm | Ni <sup>+2</sup> | 43.478      | pH=6, T=25 °C, t=60 min    | This study |
| GO          | Ni <sup>+2</sup> | 35.6        | T= 20 °C                   | 1          |
| GO          | Ni <sup>+2</sup> | 38.61       | pH=6, T=25 °C, t=50 min    | 39         |
| GO          | Ni <sup>+2</sup> | 20.19       | T=25 °C,                   |            |
| GO          | Cu <sup>+2</sup> | 277.77      | pH=6, T= 25 °C, t=60 min   | 40         |
| GO          | Co <sup>+2</sup> | 21.28       | pH=5.5, T= 25 °C, t=60 min | 24         |
| GO          | Pd <sup>+2</sup> | 98.328      | T= 25 °C                   | 41         |

Table 8. Comparison between various adsorbents for removal of Ni<sup>+2</sup> ions

| Adsorbent                                                | Metal ions       | $q_m(mg/g)$ | Ref. |
|----------------------------------------------------------|------------------|-------------|------|
| Fly ash                                                  | Ni <sup>+2</sup> | 0.03        | 25   |
| Oxidized CNTs                                            | Ni <sup>+2</sup> | 1.83        | 42   |
| Oxidized MWCNTs                                          | Ni <sup>+2</sup> | 3.73        | 43   |
| Activated carbon prepared from almond husk               | Ni <sup>+2</sup> | 30.77-37.18 | 44   |
| Graphene nanosheet/ $\delta$ -MnO <sub>2</sub> composite | Ni <sup>+2</sup> | 46.55       | 45   |
| Coir pith                                                | Ni <sup>+2</sup> | 9.50        | 46   |
| Carbon aerogel                                           | Ni <sup>+2</sup> | 12.87       | 47   |
| Scrap tire                                               | Ni <sup>+2</sup> | 25.00       | 19   |
| $\gamma$ - Fe <sub>2</sub> O <sub>3</sub>                | Ni <sup>+2</sup> | 23.60       | 48   |
| BT leaf powder                                           | Ni <sup>+2</sup> | 1.527       | 49   |
| Natural zeolite                                          | Ni <sup>+2</sup> | 8.69        | 50   |

|                         |                  |        |            |
|-------------------------|------------------|--------|------------|
| Modified zeolite (NaCl) | Ni <sup>2+</sup> | 10.46  | 50         |
| GO 450 nm               | Ni <sup>2+</sup> | 43.347 | This study |
| GO 200 nm               | Ni <sup>2+</sup> | 66.67  | This study |

Table 9: Thermodynamic parameters for the adsorption onto GO-450 nm and GO-200 nm.

| Adsorbent   | $\Delta H^\circ$ | $\Delta S^\circ$ | $\Delta G^\circ$<br>kJ/mol |         |         |
|-------------|------------------|------------------|----------------------------|---------|---------|
|             |                  |                  | 25 °C                      | 45°C    | 65°C    |
| GO – 450 nm | 1.369            | 6.377            | - 0.531                    | - 0.659 | - 0.786 |
| GO – 200 nm | 1.786            | 17.97            | - 3.565                    | - 3.924 | - 4.283 |
